# Supplementary material for: Far-UVC (222 nm) efficiently inactivates an airborne pathogen in a room-sized chamber
Source: PubMed Central journal article supplement (PMC8943125; doi:10.1038/s41598-022-08462-z), 2022-03-23
Supplement: 41598_2022_8462_MOESM1_ESM.pdf [file 41598_2022_8462_MOESM1_ESM.pdf]

## Supplementary Information

### Far-UVC efficiently inactivates an airborne pathogen in a room-sized chamber

Eadie, Ewan.<sup>1\*</sup>, Hiwar, Waseem.<sup>2</sup>, Fletcher, Louise.<sup>2</sup>, Tidswell, Emma.<sup>2</sup>, O'Mahoney, Paul.<sup>1,3</sup>, Buonanno, Manuela.<sup>4</sup>, Welch, David.<sup>4</sup>, Adamson, Catherine S.<sup>5</sup>, Brenner, David J.<sup>4</sup>, Noakes, Catherine.<sup>2</sup>, Wood, Kenneth.<sup>6</sup>

<sup>1</sup> NHS Tayside, Photobiology Unit, Ninewells Hospital and Medical School, Dundee, DD1 9SY

<sup>2</sup> School of Civil Engineering, University of Leeds, Leeds, LS2 9JT

<sup>3</sup> University of Dundee, School of Medicine Ninewells Hospital and Medical School, Dundee, DD1 9SY

<sup>4</sup> Center for Radiological Research, Columbia University Medical Center, New York, NY.

<sup>5</sup> School of Biology, Biomedical Sciences Research Complex, University of St Andrews, North Haugh, St Andrews, KY16 9ST

<sup>6</sup> SUPA, School of Physics & Astronomy, University of St Andrews, North Haugh, St Andrews, KY16 9SS

Corresponding author: ewan.eadie@nhs.scot

Supplementary S1

Table S1: Results of unpaired t-test on viable pathogen (cfu m<sup>-3</sup>) before Far-UVC Lamp switch on (SO) and from 25 – 50 minutes after lamp SO.

|        |         | Unpaired t-test             |                           |                             |                           |    |       |         |
|--------|---------|-----------------------------|---------------------------|-----------------------------|---------------------------|----|-------|---------|
|        |         | Before SO                   |                           | After SO                    |                           | df | t(df) | p       |
|        |         | Mean (cfu m <sup>-3</sup> ) | SD (cfu m <sup>-3</sup> ) | Mean (cfu m <sup>-3</sup> ) | SD (cfu m <sup>-3</sup> ) |    |       |         |
| High   | 1 Lamp  | 3491                        | 736.4                     | 220.8                       | 34.10                     | 14 | 10.72 | <0.0001 |
|        | 5 Lamps | 23761                       | 2239                      | 381.7                       | 162.1                     | 14 | 25.18 | <0.0001 |
| Medium | 1 Lamp  | 3741                        | 457.1                     | 1277                        | 150.4                     | 9  | 12.53 | <0.0001 |
|        | 5 Lamps | 3927                        | 280.4                     | 314                         | 37.05                     | 14 | 30.96 | <0.0001 |
| Low    | 1 Lamp  | 8260                        | 1334                      | 7207                        | 316.4                     | 12 | 1.878 | 0.0849  |
|        | 5 Lamps | 10684                       | 2466                      | 7621                        | 358.8                     | 12 | 2.990 | 0.0113  |

Supplementary S2

Experiment Data

| Time from lamp switch on (mins)  | cfu m <sup>-3</sup> |        |        |        |         |         |             |
|----------------------------------|---------------------|--------|--------|--------|---------|---------|-------------|
|                                  | High                |        | Medium |        | Low     |         | Repeat High |
|                                  | 1 Lamp              | 5 Lamp | 1 Lamp | 5 Lamp | 1 Lamp  | 5 Lamp  | 5 Lamp      |
| -45                              | 4160.7              | 2035.7 |        | 3660.7 |         |         | 25750.0     |
| -40                              | 3321.4              | 2937.5 |        | 3830.4 |         |         | 21142.9     |
| -35                              | 3357.1              | 2250.0 |        | 3607.1 | 8401.8  | 7864.3  | 21642.9     |
| -30                              | 2383.9              | 2142.9 |        | 4196.4 | 11383.9 | 10297.6 | 26178.6     |
| -25                              | 2178.6              | 2339.3 |        | 3910.7 | 7803.6  | 12696.4 | 25107.1     |
| -20                              | 3830.4              | 2375.0 | 3321.4 | 3580.4 | 7840.1  | 8616.1  | 24714.3     |
| -15                              | 4200.7              | 1910.7 | 3848.2 | 3892.9 | 8419.6  | 14125.0 | 24107.1     |
| -10                              | 4366.1              | 2098.2 | 3758.9 | 4419.6 | 7348.2  | 13705.4 | 26178.6     |
| -5                               | 3705.4              | 2901.8 | 4437.5 | 3946.4 | 7232.1  | 9241.1  | 22821.4     |
| 0                                | 3401.8              | 2303.6 | 3339.3 | 4223.2 | 7652.0  | 8928.6  | 19964.3     |
| 5                                | 535.7               | 26.8   | 3196.4 | 2794.6 | 7794.6  | 8785.7  |             |
| 10                               | 276.8               | 17.9   | 2714.3 | 767.9  | 7732.1  | 7303.6  |             |
| 15                               | 285.7               | 8.9    | 2285.7 | 339.3  | 7919.6  | 7714.3  |             |
| 20                               | 178.6               | 9.0    | 1741.1 | 339.3  | 8214.3  | 7517.9  | 500.0       |
| 25                               | 214.3               | 0.0    | 1526.8 | 250.0  | 7250.0  | 7723.2  | 678.6       |
| 30                               | 187.5               | 0.0    | 1330.4 | 312.5  | 7776.8  | 6973.2  | 205.4       |
| 35                               | 178.6               | 0.0    | 1285.7 | 339.3  | 7205.4  | 7821.4  | 383.9       |
| 40                               | 226.2               | 8.9    | 1267.9 | 348.2  | 7000.0  | 8017.9  | 333.9       |
| 45                               | 258.9               | 0.0    | 1151.8 | 294.6  | 7160.7  | 7508.9  | 401.8       |
| 50                               | 258.9               | 0.0    | 1098.2 | 339.3  | 6848.2  | 7678.6  | 285.7       |
| Average lamps off                | 3490.6              | 2329.5 | 3741.1 | 3926.8 | 8260.2  | 10684.3 | 23760.7     |
| Average lamps on (after 20 mins) | 220.7               | 1.5    | 1276.8 | 314.0  | 7206.8  | 7620.5  | 381.5       |
| % reduction                      | 93.7                | 99.9   | 65.9   | 92.0   | 12.8    | 28.7    | 98.4        |
| St Dev                           | 34.3                | 3.6    | 150.4  | 37.2   | 316.3   | 358.8   | 162.0       |
| St Dev (%)                       | 1.0                 | 0.2    | 4.0    | 0.9    | 3.8     | 3.4     | 0.7         |
| 2 St Dev                         | 2.0                 | 0.3    | 8.0    | 1.9    | 7.7     | 6.7     | 1.4         |
| Range (+1 St Dev)                | 94.7                | 100.1  | 69.9   | 93.0   | 16.6    | 32.0    | 99.1        |
| Range (-1 St Dev)                | 92.7                | 99.8   | 61.9   | 91.1   | 8.9     | 25.3    | 97.7        |
| eACH (Mean)                      | 44                  | 4,693  | 6      | 35     | 0       | 1       | 184         |
| eACH (Mean + 1 SD)               | 53                  | N/A    | 7      | 40     | 1       | 1       | 322         |
| eACH (Mean - 1 SD)               | 38                  | 1,358  | 5      | 31     | 0       | 1       | 128         |
